# Supplementary material
Source: PubMed Central journal article supplement (PMC8027942)

## Supplemental Online Content

Muñoz-Garza FZ, Ríos M, Roé-Crespo E, et al. Efficacy and safety of topical timolol for the treatment of infantile hemangioma in the early proliferative stage: a randomized clinical trial. *JAMA Dermatol*. Published online April 7, 2021.  
doi:10.1001/jamadermatol.2021.0596

### **eMethods.**

**eTable 1.** Baseline characteristics of patients with infantile hemangiomas

**eTable 2.** Blood pressure and heart rate measurements at baseline and 1-hour post initial treatment

**eFigure.** Lesion thickness, by category, in IH patients treated with timolol or placebo for 24 weeks

This supplemental material has been provided by the authors to give readers additional information about their work.

## eMethods

### Inclusion and exclusion criteria

Patients aged 10–60 days, with focal or segmental IH (lesion size 0.3–5 cm) of any morphology (superficial, deep, mixed, precursor or abortive), were enrolled in the trial. Main exclusion criteria were: IH patients with an indication for systemic therapy (ulcerated, mucosal surface or disfiguring IH) or receiving another IH treatment modality ( $\beta$ -blockers, corticosteroids, interferon, cyclophosphamide, vincristine); hemangiomas associated with PHACE or PELVIS/SACRAL/LUMBAR syndromes, or affecting any internal organ or airway; patients with an underlying disease

including bronchial asthma, severe pulmonary disease, sinus bradycardia, second- or third-degree atrioventricular block, overt heart failure or cardiogenic shock; patients with congenital defects including chromosomal syndromes or congenital heart disease (tetralogy of Fallot, transposition of large vessels, ventricular septal defect, atrial septal defect, patent ductus arteriosus); patients with malignancies (e.g. leukemia, sarcoma, neuroblastoma, retinoblastoma); and hypersensitivity to the active substance or excipients.

### Statistical analyses

Quantitative data were described by percentages, arithmetic mean, median, interquartile range (IQR) and standard deviation (SD). Fisher's test was used to evaluate the possible change in response to treatment, with calculation of odds ratio (OR) and confidence intervals (CIs). Changes in lesion volume, thickness and

colour were analysed by a Wilcoxon test for paired data. Analysis of variance (ANOVA) and the non-parametric Friedman test were used for comparisons of the time courses between treatment groups. Statistical significance was set at the 5% level. SPSS v25.0 (IBM) was used for all statistical analyses.

Patients withdrawn from the study were considered as treatment failures for the primary endpoint and as missing data for the other endpoints.

eTable 1. Baseline characteristics of patients with infantile hemangiomas

| Characteristic                    | No. (%)               |                       |                       |
|-----------------------------------|-----------------------|-----------------------|-----------------------|
|                                   | Timolol (n = 33)      | Placebo (n = 37)      | Total (n = 70)        |
| Sex                               |                       |                       |                       |
| Female                            | 29 (41)               | 27 (39)               | 56 (80)               |
| Male                              | 4 (6)                 | 10 (14)               | 14 (20)               |
| Age at inclusion, mean (SD), d    | 50.9 (8.3)            | 43.3 (11.4)           | 48.4 (10.6)           |
| Gestational age, wk               |                       |                       |                       |
| <37                               | 9 (27)                | 8 (22)                | 17 (25)               |
| >37                               | 24 (73)               | 28 (78)               | 52 (75)               |
| <b>Infantile hemangioma</b>       |                       |                       |                       |
| Localization                      |                       |                       |                       |
| Head/face                         | 7 (21)                | 17 (46)               | 24 (34)               |
| Other body sites                  | 26 (79)               | 20 (54)               | 46 (66)               |
| Form                              |                       |                       |                       |
| Segmented                         | 4 (12)                | 3 (8)                 | 7 (10)                |
| Localized                         | 29 (88)               | 32 (86)               | 61 (87)               |
| Indeterminate                     | 0                     | 2 (5)                 | 2 (3)                 |
| Subtype                           |                       |                       |                       |
| Superficial                       | 22 (67)               | 30 (81)               | 52 (74)               |
| Mixed                             | 6 (18)                | 5 (14)                | 11 (16)               |
| Minimal or arrested growth        | 4 (12)                | 2 (5)                 | 6 (9)                 |
| Deep                              | 1 (3)                 | 0                     | 1 (1)                 |
| Lesion volume, mm <sup>3</sup>    |                       |                       |                       |
| Median (IQR)                      | 136.71 (29.53-344.79) | 106.46 (35.80-315.31) | 121.58 (35.80-321.80) |
| <10                               | 3 (9)                 | 3 (8)                 | 6 (9)                 |
| 11-100                            | 9 (27)                | 12 (32)               | 21 (30)               |
| 101-1000                          | 16 (48)               | 17 (46)               | 33 (47)               |
| >1000                             | 5 (5)                 | 5 (14)                | 10 (14)               |
| Lesion thickness, mm <sup>3</sup> |                       |                       |                       |
| Mean (SD)                         | 1.91 (0.35)           | 1.86 (0.35)           | 1.31 (0.90)           |
| <1                                | 4 (12)                | 5 (14)                | 9 (13)                |
| 1-3                               | 28 (85)               | 32 (86)               | 50 (86)               |
| >3                                | 1 (3)                 | 0                     | 1 (1)                 |

Abbreviation: IQR, interquartile range.

**eTable 2. Blood pressure and heart rate measurements at baseline and 1-hour post initial treatment**

|           | Timolol        |                |               |               |                |                | Placebo       |               |               |               |                |                |
|-----------|----------------|----------------|---------------|---------------|----------------|----------------|---------------|---------------|---------------|---------------|----------------|----------------|
|           | Base line SBP  | 1hr SBP        | Base line DBP | 1hr DBP       | Base line HR   | 1hr HR         | Base line SBP | 1hr SBP       | Base line DBP | 1hr DBP       | Base line HR   | 1hr HR         |
| Mean (SD) | 103.97 (17.64) | 102.70 (11.34) | 55.73 (14.41) | 54.30 (10.32) | 142.82 (15.91) | 138.91 (16.45) | 98.84 (20.12) | 94.14 (15.34) | 52.11 (14.26) | 94.14 (15.34) | 144.78 (13.97) | 140.84 (14.08) |
| <i>P</i>  | .3014          |                | .2458         |               | .0564          |                | .0932         |               | .2275         |               | .0533          |                |

DBP, diastolic blood pressure; HR, heart rate; SBP systolic blood pressure; SD, standard deviation.

**eFigure. Lesion thickness, by category, in IH patients treated with timolol or placebo for 24 weeks. The 36-week time point includes 12-week post-treatment surveillance.**

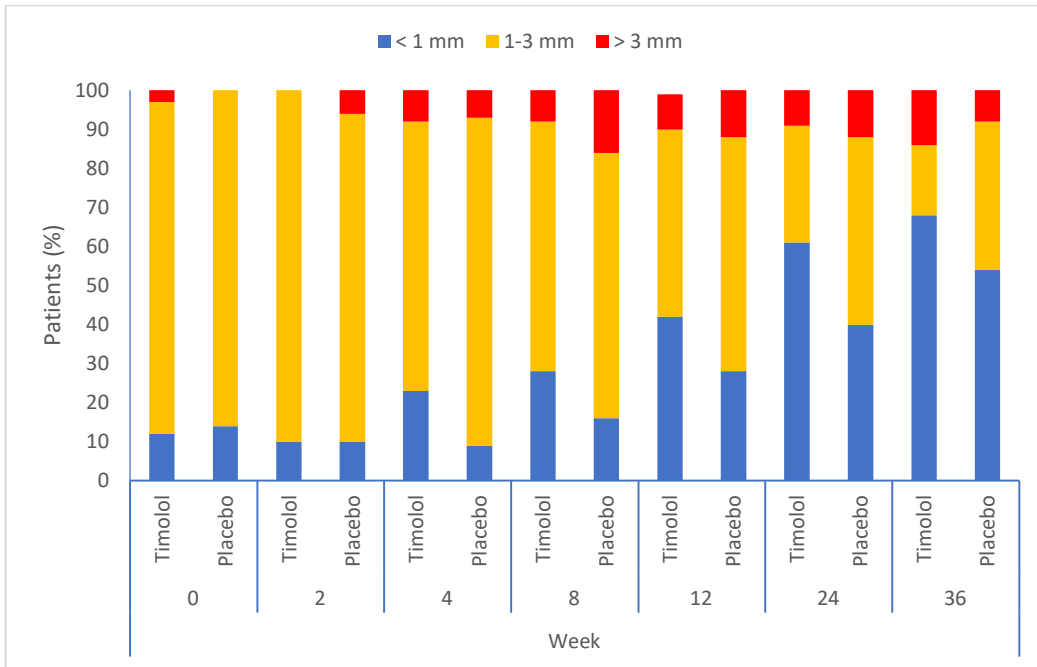

Supplement: jamadermatol-e210596-s002.pdf [file jamadermatol-e210596-s002.pdf]
